# Supplementary material
Source: Springer Nature journal article supplement (https://www.springermedizin.de/resource/supplementary/12885_2011_2879_MOESM4_ESM.pdf/9462222)

# Testing set (n=86)

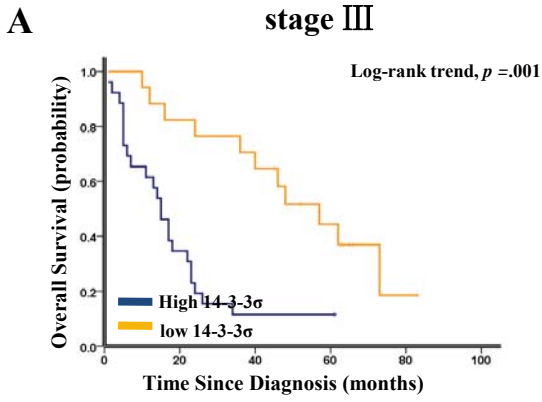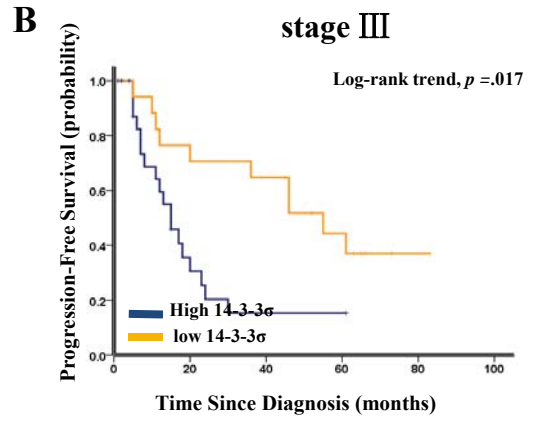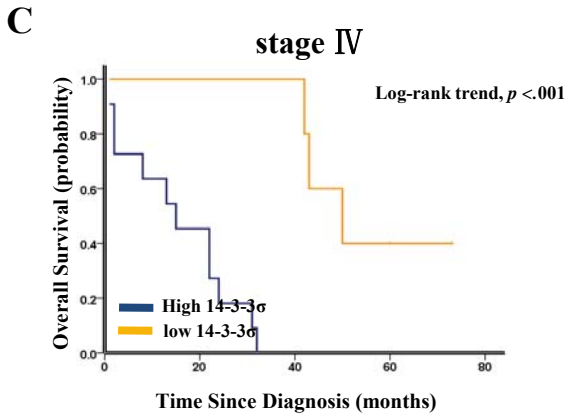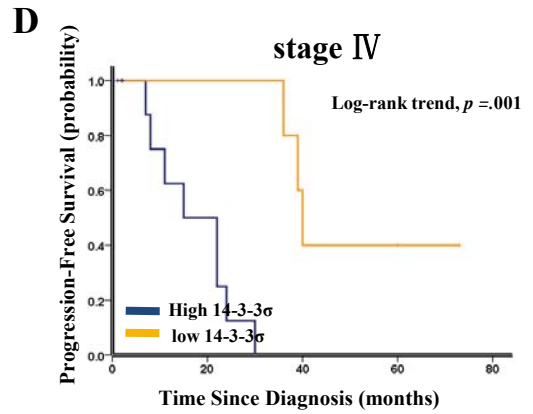

# Overall patients (n=152)

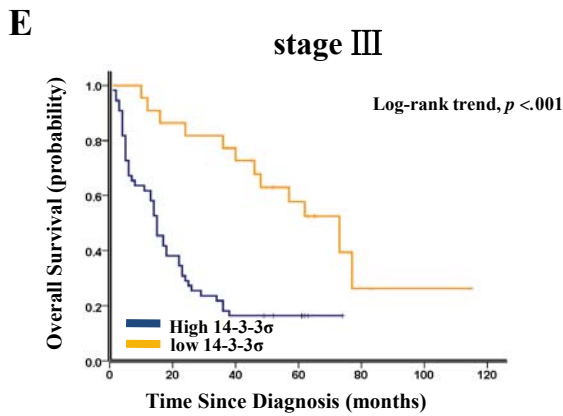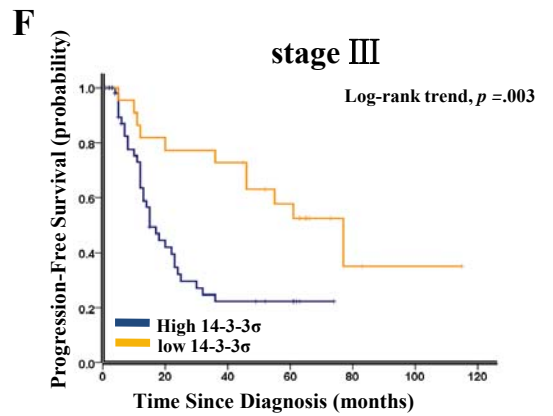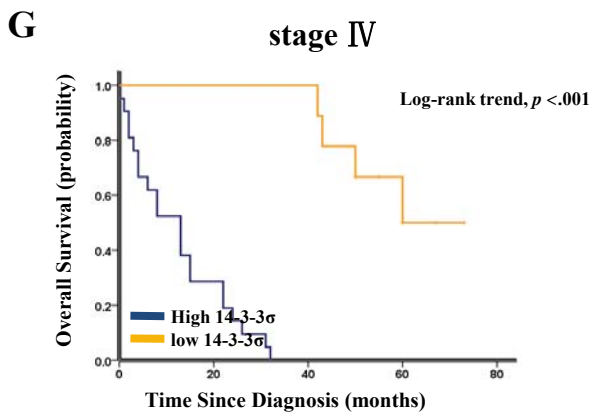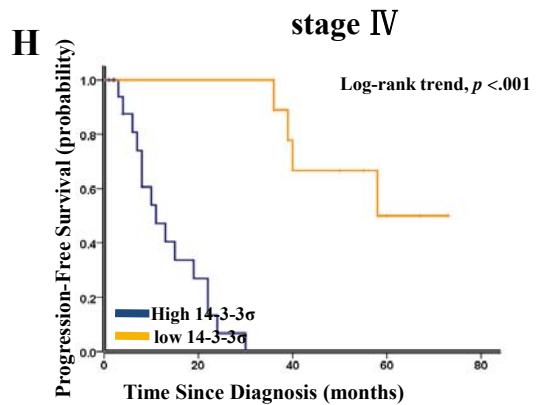

Supplement: MOESM4 [file 9462222]
